# Supplementary material
Source: publisher figshare collection journal article supplement (https://acs.figshare.com/ndownloader/files/4212883)
Supplement: Supplementary file 1 [file 4212883]

Supplementary Figure 1 Electron Density around BPTES

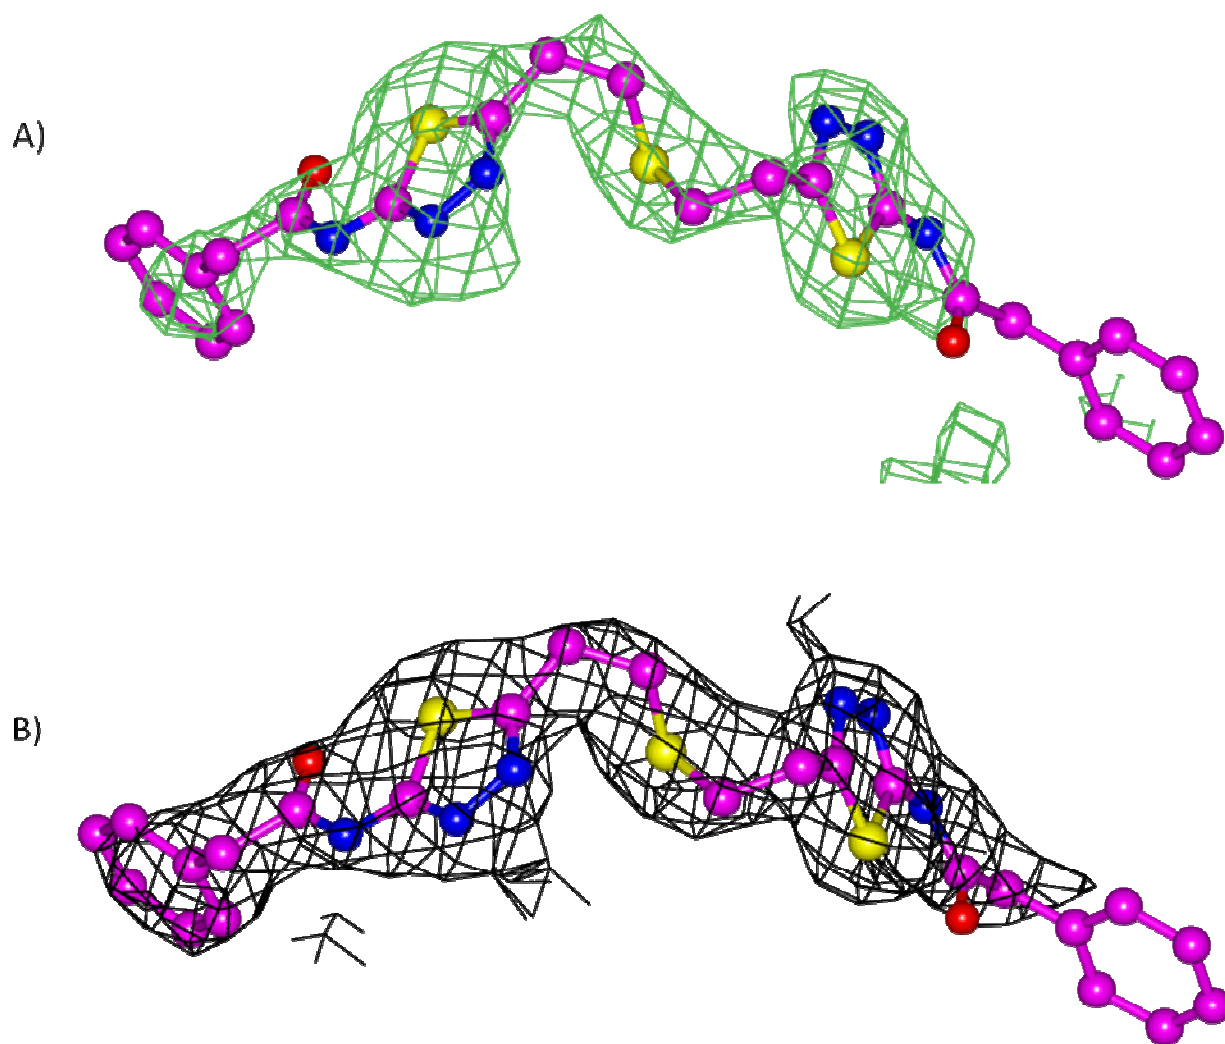

### Supplementary Figure 1 Caption

- a) Fo-Fc electron density (green) around BPTES (magenta carbons) molecule 1. Model was subjected to 10 cycles of refinement with BPTES atoms set to 0 occupancy. Figure depicts positive Fo-Fc density contoured at 3 sigma or 0.1 e/A<sup>3</sup>. Electron density maps around second BPTES molecule are of similar quality.
- b) 2Fo-Fc electron density (black) from final round of refinement around BPTES. Map is contoured at 1 sigma or 0.24 e/A<sup>3</sup>
